# Supplementary material for: Heteroresistance to Colistin in Clinical Isolates of Klebsiella pneumoniae Producing OXA-48
Source: MDPI journal article supplement (doi:10.3390/antibiotics12071111), 2023-06-27
Supplement: s1 [file s1]

**Table S1.** Antimicrobial susceptibility testing with different antimicrobial agents.

| ANTIMICROBIAL AGENTS |                                        | HURS-0269 | HURS-0271 | HURS-0285 | HURS-0286 | HURS-0288 | HURS-0958 | HURS-0337 | HURS-181073 | HURS-183019 |
|----------------------|----------------------------------------|-----------|-----------|-----------|-----------|-----------|-----------|-----------|-------------|-------------|
| AMI                  | Amikacin                               | ≤4        | 16        | ≤4        | ≤4        | ≤4        | 8         | ≤4        | ≤4          | 16          |
| AUGC                 | Amoxicillin/clavulanic acid constant 2 | >64/2     | >64/2     | >64/2     | >64/2     | >64/2     | >64/2     | >64/2     | >64/2       | >64/2       |
| AZT                  | Aztreonam                              | 32        | >32       | 16        | ≤0.5      | >32       | >32       | >32       | >32         | >32         |
| FOT                  | Cefotaxime                             | >8        | >8        | >8        | 1         | >8        | >8        | >8        | >8          | >8          |
| TAZ                  | Ceftazidime                            | 8         | >16       | >16       | 4         | >16       | >16       | >16       | >16         | >16         |
| CZA                  | Ceftazidime/avibactam                  | ≤0.5/4    | 1/4       | 1/4       | ≤0.5/4    | 1/4       | ≤0.5/4    | ≤0.5/4    | ≤0.5/4      | ≤0.5/4      |
| C/T                  | Ceftolozane/tazobactam 4               | 8/4       | >32/4     | 8/4       | 2/4       | >32/4     | >32/4     | 8/4       | 16/4        | 32/4        |
| CIP                  | Ciprofloxacin                          | 2         | 1         | >2        | 0.25      | >2        | >2        | >2        | >2          | >2          |
| COL                  | Colistin                               | 0.5       | 0.5       | 0.5       | 1/0.5     | 1/0.5     | 0.5       | 1         | 2/1         | >8/8        |
| ETP                  | Ertapenem                              | >2        | >2        | >2        | >2        | >2        | >2        | 0.5       | >2          | >2          |
| GEN                  | Gentamicin                             | >8        | >8        | >8        | ≤0.5      | >8        | ≤0.5      | >8        | ≤0.5        | 1           |
| IMI                  | Imipenem                               | 2         | 8         | 1         | 2         | 1         | 8         | ≤0.5      | 1           | 1           |
| MERO                 | Meropenem                              | 1         | >16       | 0.5       | 1         | 1         | 16        | ≤0.12     | 0.5         | 2           |
| P/T4                 | Piperacillin/tazobactam constant 4     | >32/4     | >32/4     | >32/4     | > 32/4    | >32/4     | >32/4     | >32/4     | >32/4       | >32/4       |
| TGC                  | Tigecycline                            | ≤0.25     | 1         | ≤0.25     | 2         | 0.5       | 1         | 0.5       | ≤0.25       | 1           |
| TOB                  | Tobramycin                             | >8        | >8        | >8        | ≤1        | >8        | >8        | >8        | >8          | >8          |
| SXT                  | Trimethoprim/sulfamethoxazole          | >8/152    | >8/152    | >8/152    | ≤1/19     | >8/152    | >8/152    | >8/152    | >8/152      | >8/152      |
